1 Genome of the parasitoid wasp *Diachasma alloeum*, an emerging model for  
2 ecological speciation and transitions to asexual reproduction

3  
4 Eric S. Tvedte<sup>1\*</sup>, Kimberly K.O. Walden<sup>2</sup>, Kyle E. McElroy<sup>3</sup>, John H. Werren<sup>4</sup>, Andrew A.  
5 Forbes<sup>3</sup>, Glen R. Hood<sup>5</sup>, John M. Logsdon Jr.<sup>3</sup>, Jeffrey L. Feder<sup>6</sup>, Hugh M. Robertson<sup>2\*</sup>

6  
7 <sup>1</sup>Institute for Genome Sciences, University of Maryland School of Medicine, Baltimore, MD.

8 <sup>2</sup>University of Illinois at Urbana-Champaign, Urbana, IL. <sup>3</sup>University of Iowa, Iowa City, IA.

9 <sup>4</sup>University of Rochester, Rochester, NY. <sup>5</sup>Wayne State University, Detroit, MI. <sup>6</sup>University of  
10 Notre Dame, South Bend, IN.

11

12 EST: [etvedte@som.umaryland.edu](mailto:etvedte@som.umaryland.edu)

13 KKO: [kosterbu@illinois.edu](mailto:kosterbu@illinois.edu)

14 KEM: [kyle-mcelroy@uiowa.edu](mailto:kyle-mcelroy@uiowa.edu)

15 JHW: [jack.werren@rochester.edu](mailto:jack.werren@rochester.edu)

16 AAF: [andrew-forbes@uiowa.edu](mailto:andrew-forbes@uiowa.edu)

17 GRH: [glenrayhood@gmail.com](mailto:glenrayhood@gmail.com)

18 JML: [john-logsdon@uiowa.edu](mailto:john-logsdon@uiowa.edu)

19 JLF: [feder.2@nd.edu](mailto:feder.2@nd.edu)

20 HMR: [hughrobe@life.uiuc.edu](mailto:hughrobe@life.uiuc.edu)

21 \*Authors for Correspondence:

22 Eric Tvedte, Institute for Genome Sciences, University of Maryland School of Medicine,

23 Baltimore, MD, 21201, ph: 410-706-6775, [etvedte@som.umaryland.edu](mailto:etvedte@som.umaryland.edu).

24 Hugh M. Robertson, Department of Entomology, University of Illinois at Urbana-Champaign,

25 Urbana, IL, 61801, ph: 217-333-0489, fax: 217-244-3499, [hughrobe@life.uiuc.edu](mailto:hughrobe@life.uiuc.edu).

26

27 Data deposition: The Raw read data may be accessed on NCBI SRA database and can be

28 accessed via BioProject portals for genome (PRJNA284396) and transcriptome (PRJNA283787)

29 datasets.

30 **Abstract**

31 Parasitoid wasps are among the most speciose animals, yet have relatively few available genomic  
32 resources. We report a draft genome assembly of the wasp *Diachasma alloeum* (Hymenoptera:  
33 Braconidae), a host-specific parasitoid of the apple maggot fly *Rhagoletis pomonella* (Diptera:  
34 Tephritidae) and a developing model for understanding how ecological speciation can “cascade”  
35 across trophic levels. Identification of gene content confirmed the overall quality of the draft  
36 genome, and we manually annotated ~400 genes as part of this study, including those involved in  
37 oxidative phosphorylation, chemosensation, and reproduction. Through comparisons to model  
38 hymenopterans such as the European honeybee *Apis mellifera* and parasitoid wasp *Nasonia*  
39 *vitripennis*, as well as a more closely related braconid parasitoid *Microplitis demolitor*, we  
40 identified a proliferation of transposable elements in the genome, an expansion of chemosensory  
41 genes in *D. alloeum* and other parasitoid wasps, and the maintenance of several key genes with  
42 known roles in sexual reproduction and sex determination. The *D. alloeum* genome will provide  
43 a valuable resource for comparative genomics studies in Hymenoptera as well as specific  
44 investigations into the genomic changes associated with ecological speciation and transitions to  
45 asexuality.

46

47 **Keywords:** Hymenoptera, sequential speciation, *de novo* genome assembly, genome evolution,  
48 chemosensory genes

## 49 **Introduction**

50 The Hymenoptera may be the largest order of insects due to the immense diversity of parasitic  
51 wasps (*i.e.* “parasitoids”) that lay their eggs into or on other insect species (LaSalle & Gould,  
52 1993; Austin & Dowton, 2000; Whitfield, 2003; Forbes *et al.*, 2018). The great diversity of  
53 parasitoid wasps may be a consequence of their close relationship with their insect hosts. When a  
54 specialist parasitoid shifts to a new host, this change can propel the evolution of reproductive  
55 isolating barriers between wasp populations using the new and ancestral hosts (Feder & Forbes,  
56 2010). The evolution of reproductive isolating barriers following a host shift is a well-  
57 documented phenomenon in host specialist insects (Forbes *et al.*, 2017), but the study of  
58 genomic changes that accompany such phenomena is still in its early stages.

59 *Diachasma alloeum* (Hymenoptera: Braconidae) is a specialist parasitoid of the fruit fly  
60 *Rhagoletis pomonella* (Diptera: Tephritidae). After the introduction of domesticated apples to the  
61 United States from Europe, *R. pomonella* infesting native hawthorn fruits experienced a host  
62 shift and subsequently evolved reproductive isolating barriers in what has become a well-known  
63 example of incipient ecological speciation (Walsh, 1867; Bush, 1966; Bush, 1994; Nosil, 2012).  
64 This new “apple maggot fly” was sequentially colonized by *D. alloeum*, which appears to have  
65 shifted from its ancestral host, the blueberry maggot *Rhagoletis mendax* (Forbes *et al.*, 2009).  
66 Two reproductive isolating barriers (*i.e.* diapause emergence and host fruit volatile  
67 discrimination) have evolved in parallel in *R. pomonella* and *D. alloeum*, and in both fly and  
68 wasp, these traits appear to have a genetic basis (Dambroski *et al.*, 2005, Forbes & Feder, 2006,  
69 Forbes *et al.*, 2009). This phenomenon of “sequential” or “cascading” speciation may be an  
70 important driver of new biodiversity (Stireman *et al.*, 2006; Abrahamson & Blair, 2007; Hood *et*  
71 *al.*, 2015).

72           Reproductive isolation in genus *Diachasma* has also arisen as a consequence of the loss  
73 of sexual reproduction, a general pattern observed in many hymenopteran insects (van der Kooi  
74 *et al.*, 2017). Asexual *D. muliebre* appears to have split from its sexual sister *D. ferrugineum*  
75 between 0.5 and 1 mya (Wharton & Marsh, 1978; Forbes *et al.*, 2013). Although the decay of  
76 genes involved in sexual traits has been observed in multiple asexual parasitoid wasps (*e.g.* Ma  
77 *et al.*, 2014; Kraaijeveld *et al.*, 2016), there is a dearth of comparative assessments of genomic  
78 molecular evolution between sexual and asexual Hymenoptera.

79           Here, we report the *de novo* genome assembly of the parasitoid wasp *D. alloeum*, adding  
80 to the genomic resources for parasitoid wasps, which are underrepresented among available  
81 hymenopteran genomes (Branstetter *et al.*, 2017). We performed a series of descriptive analyses  
82 to assess the overall quality and content of the *D. alloeum* genome, and then focused on  
83 annotation and evolutionary analyses of gene families with potential relevance to speciation and  
84 sex determination in *Diachasma*.

## 85 **Results and Discussion**

### 86 **Quality assessment of genome assembly**

87 Libraries from a combination of single and pooled wasp samples contained 182.88 GB total  
88 sequence data. The *de novo* genome assembly Dall1.0 (GenBank accession: GCA\_001412515.1)  
89 had 3,968 scaffolds with a total scaffold length of 388.8 Mb and a scaffold N50 of 645,583 bp  
90 (Table 1). The presence of prokaryotic-like sequences in eukaryotic genome projects may reflect  
91 contamination in sequencing libraries or an actual association between microorganisms and  
92 hosts. Of the *D. alloeum* scaffolds, we annotated 656 as likely bacterial contaminants and an  
93 additional scaffold (RefSeq accession: NW\_015145431.1) as an apparent lateral gene transfer  
94 event from a *Rickettsia* species (Supplementary Material online). The likely bacterial

95 contaminating scaffolds were removed from the *D. alloeum* assembly, and the remaining 3,313  
96 scaffolds will be made available as genome assembly Dall2.0.

97         A common metric used to assess the relative completeness of a genome assembly is the  
98 identification of conserved single-copy genes, performed here using BUSCO v3 (Simão *et al.*,  
99 2015). We found 1060/1066 (99%) arthropod-specific BUSCO genes in the *D. alloeum* genome,  
100 including 1053/1066 complete genes. These values are similar to BUSCO gene content in other  
101 published hymenopteran genomes (Table 2, Supplementary Material online). Our *de novo*  
102 assembly of the *D. alloeum* mitochondrial sequence using NOVOplasty (Dierckxsens *et al.*,  
103 2017) produced a 15,936 bp sequence with a complete set of thirteen protein coding genes, two  
104 rRNA sequences, and 20 tRNA sequences. In addition, our annotation of 65/68 (96%) of the  
105 canonical suite of nuclear-encoded mitochondrial genes provided additional evidence for a high-  
106 quality genome assembly (Supplementary Material online).

107         We used RepeatModeler (Smit *et al.*, 2015), PASTEClassifier (Hoede *et al.*, 2014,  
108 version 1.0) and RepeatMasker (Smit *et al.*, 2010) for *de novo* repeat identification, repeat  
109 reclassification, and repeat quantification, respectively (Supplementary Material online).  
110 Remarkably, nearly half (49%) of the *D. alloeum* genome consisted of repetitive sequences,  
111 although a substantial contributor (30%) was from unclassified repetitive sequences.

112

### 113 **Expansion of species-specific chemosensory genes in *D. alloeum***

114 Chemoreception in arthropods is mediated by three major families of receptors: odorant  
115 receptors (**ORs**), gustatory receptors (**GRs**), and ionotropic receptors (**IRs**) (Clyne *et al.*, 1999;  
116 Clyne *et al.* 2000; Benton *et al.*, 2009). In addition, two major families of water-soluble proteins  
117 are responsible for transport and/or quenching of ligands to chemosensory receptors: odorant

118 binding proteins (**OBPs**) and chemosensory proteins (**CSPs**) (Vieira & Rozas, 2011; Pelosi *et al.*,  
119 2014; Larter *et al.*, 2016). Chemosensory discrimination of fruit volatiles is an important axis of  
120 divergence among host fly-associated populations of *D. alloeum*, initiating reproductive isolating  
121 barriers between these wasps (Forbes *et al.*, 2009).

122 Previous characterizations of chemosensory genes in hymenopteran insects, in particular  
123 the gene-rich receptor families, demonstrate that automated gene prediction pipelines are  
124 generally poor at accurately predicting these gene models (Robertson & Wanner, 2006;  
125 Robertson *et al.*, 2010; Croset *et al.*, 2010; Zhou *et al.*, 2015; Robertson *et al.*, 2018). We  
126 therefore manually annotated a total of 321 gene models that represents the full inventory of five  
127 chemosensory gene families in *D. alloeum* (Table 3, Supplementary Material online). Consistent  
128 with GO-enrichment analyses produced by OrthoVenn, we found lineages of OR expansions in  
129 *D. alloeum*, and clusters of GR homologs present in the braconid wasps *D. alloeum* and *M.*  
130 *demolitor* but absent in the well-studied hymenopterans *Nasonia vitripennis* or *Apis mellifera*.  
131 We also observed a notable expansion of IRs in *D. alloeum* relative to another *Microplitis*  
132 species, *M. mediator* (Figure 2). As odor discrimination has likely contributed to reproductive  
133 isolation following a host shift in *D. alloeum*, this dataset will be important for the study of  
134 chemosensory gene composition and evolutionary rate differences within and between  
135 *Diachasma* species.

136

### 137 ***D. alloeum* contains canonical genes involved in reproduction and sex determination**

138 Hymenoptera is an insect order characterized by haplodiploid sex determination, providing an  
139 opportunity for studying the evolution of reproductive modes, including transitions from sexual  
140 to asexual systems. Meiosis is essential to obligate sexual reproduction, such that loss of sex may

141 be accompanied by the subsequent degradation of meiotic genetic machinery (Schurko &  
142 Logsdon, 2008). However, identical sets of meiosis genes in *D. alloeum* (sexual) and *D.*  
143 *muliebre* (asexual) (Tvedte *et al.*, 2017) and population genetic data implying that the asexual *D.*  
144 *muliebre* undergoes recombination (Forbes *et al.*, 2013) together suggests that asexual wasps  
145 retain meiotic production of gametes despite the loss of sexual reproduction. Given the apparent  
146 lack of male production in *D. muliebre*, a non-canonical form of meiosis could facilitate the  
147 maintenance of genetic variation and promote the persistence of this asexual lineage.

148         In many hymenopterans, development into male *vs.* female forms is based on allelic  
149 states at a single locus, a mechanism known as complementary sex determination (CSD) (van  
150 Wilgenburg *et al.*, 2006). In *A. mellifera* specifically, sex determination depends on the *csd* gene  
151 (Hasselmann *et al.*, 2008). We found no evidence of the *csd* locus in *D. alloeum*, however our  
152 inability to consistently rear wasps in the laboratory at the current time precludes our ability to  
153 definitively rule out CSD as a sex determination mechanism. In CSD and non-CSD  
154 hymenopterans, a well-conserved sex determination regulatory cascade includes *transformer* and  
155 *doublesex*, both displaying sex-specific splicing (Geuverink & Beukeboom, 2014). We identified  
156 single copies of *transformer* and *doublesex* genes in *D. alloeum* (Genbank TBD).

157         Sex determination genes may be targets of selection in asexual Hymenoptera. Across  
158 insects, male production occurs due to alternative splicing of *transformer* rendering the protein  
159 nonfunctional, leading to male-splicing of *doublesex*. Conversely, translation of full-length  
160 *transformer* into functional protein mediates the splicing of female-specific *doublesex* isoforms  
161 (Verhulst *et al.*, 2010). RNA-seq read mapping patterns supported sex-specific *transformer*  
162 isoforms in *D. alloeum* (Supplementary Figure S10). In all-female *Diachasma* species, we would  
163 expect selection to preserve the full-length *transformer* gene. In *doublesex*, the female isoform in



164 *D. alloeum* is shorter (Supplementary Figure S11), similar to splicing patterns in other insects  
165 (Cho *et al.*, 2007; Oliveira *et al.*, 2009). The single exon specific to males may be subject to  
166 future degradation following sex loss in asexual *Diachasma* species.

167 Additional genes contributing to sex-specific traits (*e.g.* sperm production, pheromones,  
168 pigmentation) may be candidates for degradation in asexual wasps (van der Kooi & Schwander,  
169 2014; Kraaijeveld *et al.*, 2016). The high quality of *D. alloeum* assembly provides a suitable  
170 framework for future studies of the effects of sexual and asexual reproductive modes on patterns  
171 of molecular evolution across the wasp genome.

172

## 173 **Materials and Methods**

174 We isolated genomic DNA from a single haploid male and separately from pooled animals of  
175 both sexes collected in Fennville, Michigan, USA. A combination of Illumina paired-end, mate  
176 pair, and TruSeq Synthetic Long Read (TSLR) libraries were each sequenced on an Illumina  
177 HiSeq2000 separately for the single male and pooled samples. Paired-end and mate pair reads  
178 were *de novo* assembled using SOAPdenovo2 v2.04 (Li *et al.*, 2010) and added TSLR “reads”  
179 using PBJelly v2 (English *et al.*, 2012). We removed putative microbial contaminant sequences  
180 from the assembly that were identified by both BlobTools (Laetsch & Blaster, 2017) and a  
181 separate custom pipeline developed by Wheeler *et al.* (2013) and modified as described in  
182 Poynton *et al.* (2018). We separately assembled the mitochondrial genome *de novo* using  
183 NOVOplasty v2.6.3 (Dierckxsens *et al.*, 2017).

184 We used ten wasps of each sex to generate two (pooled male and pooled female) paired-  
185 end RNASeq libraries, and sequenced read libraries using an Illumina HiSeq2500. We combined  
186 read datasets and assembled a transcriptome *de novo* with Trinity (Release 2014-04-13)

187 (<http://trinityrnaseq.github.io/>) (Grabherr *et al.* 2011; Haas *et al.* 2013). Annotation of the *D.*  
188 *alloeum* genome assembly was performed by the NCBI using their Eukaryotic Genome  
189 Annotation Pipeline ([https://www.ncbi.nlm.nih.gov/genome/annotation\\_euk/process/](https://www.ncbi.nlm.nih.gov/genome/annotation_euk/process/)), with  
190 experimental support from the RNAseq and transcriptome. Manual annotations were added to a  
191 *D. alloeum* project on the i5k workspace (<https://apollo.nal.usda.gov/diaall/jbrowse/>; Poelchau *et*  
192 *al.*, 2014). See Supplementary Material online for additional information on genome sequencing,  
193 assembly, and annotation.

194

## 195 **Acknowledgements**

196 We thank the W. M. Keck Center for Comparative and Functional Genomics at the University of  
197 Illinois at Urbana-Champaign for genomic and RNA library construction and sequencing; Chris  
198 Fields at the High Performance Computing for Biology Center at the Roy J. Carver  
199 Biotechnology Center at the University of Illinois at Urbana-Champaign for performing the  
200 PBJelly scaffolding with TSLR reads; Austin Ward at the Biology Department at the University  
201 of Iowa for generating custom scripts for generating nonredundant protein datasets; Samuel  
202 Cummings at the Biology Department at the University of Iowa for contributing to annotation of  
203 chemosensory genes; and Monica Poelchau at the United States Department of Agriculture-  
204 Agricultural Research Service for generating the official gene set for *D. alloeum*. This work was  
205 supported by the United States Department of Agriculture/National Institute of Food and  
206 Agriculture (A2008-35302-18819 to H.M.R., 2015-67013-23289 to J.L.F.) and the National  
207 Science Foundation (DEB-1145355 to A.A.F; DEB-1638997 to J.L.F; DEB1257053 and  
208 IOS1456233 to J.H.W.).

## 209 **References**

- 210 Austin A, Dowton M. 2000. The Hymenoptera: an introduction. In *Hymenoptera: Evolution,*  
211 *Biodiversity and Biological Control.* eds. Austin A, Dowton M. pp 3-16. Csiro  
212 Publishing, Clayton, AU.
- 213 Benton R, Vannice KS, Gomez-Diaz C, Vosshall LB. 2009. Variant ionotropic glutamate  
214 receptors as chemosensory receptors in *Drosophila*. *Cell* 136:149-162.  
215 [doi.org/10.1016/j.cell.2008.12.001](https://doi.org/10.1016/j.cell.2008.12.001)
- 216 Abrahamson WG, Blair CP. 2007. Sequential radiation through host-race formation: herbivore  
217 diversity leads to diversity in natural enemies. In *Specialization, speciation, and*  
218 *radiation: The evolutionary biology of herbivorous insects.* ed. Tilmon KJ. pp188-200.  
219 University of California Press, Berkeley, CA, USA
- 220 Branstetter M, *et al.* 2017. Genomes of the Hymenoptera. *Curr Opin Insect Sci* 25:65-75.  
221 [doi.org/10.1016/j.cois.2017.11.008](https://doi.org/10.1016/j.cois.2017.11.008)
- 222 Burke GR, Walden KK, Whitfield JB, Robertson HM, Strand MR. 2018. Whole genome  
223 sequence of the parasitoid wasp *Microplitis demolitor* that harbors an endogenous virus  
224 mutualist. *G3-Genes Genom Genet* 8:2875-2880. <https://doi.org/10.1534/g3.118.200308>
- 225 Bush GL. 1966. The taxonomy, cytology, and evolution of the genus *Rhagoletis* in North  
226 America (Diptera, Tephritidae). *B Mus Compar Zool* 134:431-562.
- 227 Bush GL. 1994. Sympatric speciation in animals: new wine in old bottles. *Trends Ecol Evol* 8:  
228 285-288. [doi.org/10.1016/0169-5347\(94\)90031-0](https://doi.org/10.1016/0169-5347(94)90031-0)
- 229 Cho S, Huang ZY, Zhang, J. 2007. Sex-specific splicing of the honeybee *doublesex* gene  
230 reveals 300 million years of evolution at the bottom of the insect sex-determination  
231 pathway. *Genetics* 177:1733–1741. <https://doi.org/10.1534/genetics.107.078980>

- 232 Clyne PJ, *et al.* 1999. A novel family of divergent seven-transmembrane proteins: candidate  
233 odorant receptors in *Drosophila*. *Neuron* 22:327-338.  
234 [doi.org/10.1016/S0896-6273\(00\)81093-4](https://doi.org/10.1016/S0896-6273(00)81093-4)
- 235 Croset V, *et al.* 2010. Ancient protostome origin of chemosensory ionotropic glutamate receptors  
236 and the evolution of insect taste and olfaction. *PLOS Genet* 6:e1001064.  
237 [doi.org/10.1371/journal.pgen.1001064](https://doi.org/10.1371/journal.pgen.1001064)
- 238 Dambroski HR, *et al.* 2005. The genetic basis for fruit odor discrimination in *Rhagoletis* flies and  
239 its significance for sympatric host shifts. *Evolution* 59:1953-1964.  
240 [doi.org/10.1111/j.0014-3820.2005.tb01065.x](https://doi.org/10.1111/j.0014-3820.2005.tb01065.x)
- 241 Dierckxsens N, Mardulyn P, Smits G. 2016. NOVOPlasty: de novo assembly of organelle  
242 genomes from whole genome data. *Nucleic Acids Res* 45:e18.  
243 [doi.org/10.1093/nar/gkw955](https://doi.org/10.1093/nar/gkw955)
- 244 Edgar RC. 2004. MUSCLE: multiple sequence alignment with high accuracy and high  
245 throughput. *Nucleic Acids Res* 32:1792-1797. [doi.org/10.1093/nar/gkh340](https://doi.org/10.1093/nar/gkh340)
- 246 Elsik CG, *et al.* 2014. Finding the missing honey bee genes: lessons learned from a genome  
247 upgrade. *BMC genomics* 15:86. <https://doi.org/10.1186/1471-2164-15-86>
- 248 English AC, *et al.* 2012. Mind the gap: upgrading genomes with Pacific Biosciences RS long-  
249 read sequencing technology. *PLOS One* 7:e47768. [doi.org/10.1371/journal.pone.0047768](https://doi.org/10.1371/journal.pone.0047768)
- 250 Feder JL, Forbes AA. 2010. Sequential speciation and the diversity of parasitic insects. *Ecol*  
251 *Entomol* 35:67-76. [doi.org/10.1111/j.1365-2311.2009.01144.x](https://doi.org/10.1111/j.1365-2311.2009.01144.x)
- 252 Forbes AA, Bagley RK, Beer MA, Hippee AC, Widmayer HA. 2018. Quantifying the  
253 unquantifiable: why Hymenoptera—not Coleoptera—is the most speciose animal  
254 order. *BMC Ecol* 18:21. [doi.org/10.1186/s12898-018-0176-x](https://doi.org/10.1186/s12898-018-0176-x)

- 255 Forbes AA *et al.* 2017. Revisiting the particular role of host shifts in initiating insect speciation.  
256 Evolution 71:1126-1137. [doi.org/10.1111/evo.13164](https://doi.org/10.1111/evo.13164)
- 257 Forbes AA, Feder JL. 2006. Divergent preferences of *Rhagoletis pomonella* host races for  
258 olfactory and visual fruit cues. Entomol Exp Appl 119:121-127.  
259 [doi.org/10.1111/j.1570-7458.2006.00398.x](https://doi.org/10.1111/j.1570-7458.2006.00398.x)
- 260 Forbes AA, Powell THQ, Stelinski LL, Smith JJ, Feder JL. 2009. Sequential sympatric  
261 speciation across trophic levels. Science 323:776-779. [doi.org/10.1126/science.1166981](https://doi.org/10.1126/science.1166981)
- 262 Forbes AA, Rice LA, Stewart NB, Yee WL, Neiman M. 2013. Niche differentiation and  
263 colonization of a novel environment by an asexual parasitic wasp. J Evolution Biol  
264 26:1330-1340. [doi.org/10.1111/jeb.12135](https://doi.org/10.1111/jeb.12135)
- 265 Forêt S, Maleszka R. 2006. Function and evolution of a gene family encoding odorant binding-  
266 like proteins in a social insect, the honey bee (*Apis mellifera*). Genome Res 16:1404-  
267 1413. [doi.org/10.1101/gr.5075706](https://doi.org/10.1101/gr.5075706)
- 268 Forêt S, Wanner KW, Maleszka R. 2007. Chemosensory proteins in the honey bee: Insights from  
269 the annotated genome, comparative analyses and expressional profiling. Insect Biochem  
270 Molec 37:19-28. [doi.org/10.1016/j.ibmb.2006.09.009](https://doi.org/10.1016/j.ibmb.2006.09.009)
- 271 Geuverink E, Beukeboom LW. 2014. Phylogenetic distribution and evolutionary dynamics of the  
272 sex determination genes doublesex and transformer in insects. Sex Dev 8:38-49.  
273 [doi.org/10.1159/000357056](https://doi.org/10.1159/000357056)
- 274 Grabherr MG, *et al.* 2011. Full-length transcriptome assembly from RNA-Seq data without a  
275 reference genome. Nat Biotechnol 29:644-652. [doi.org/10.1038/nbt.1883](https://doi.org/10.1038/nbt.1883)

- 276 Haas BJ, *et al.* 2013. De novo transcript sequence reconstruction from RNA-seq using the  
277 Trinity platform for reference generation and analysis. *Nature Protoc* 8:1494-1512.  
278 [doi.org/10.1038/nprot.2013.084](https://doi.org/10.1038/nprot.2013.084)
- 279 Hasselmann M, *et al.* 2008. Evidence for the evolutionary nascence of a novel sex determination  
280 pathway in honeybees. *Nature* 454:519-522. [doi.org/10.1038/nature07052](https://doi.org/10.1038/nature07052)
- 281 Hoede C, *et al.* 2014. PASTEC: An automatic transposable element classification tool. *PLoS*  
282 *ONE*. 9, e91929. [doi.org/10.1371/journal.pone.0091929](https://doi.org/10.1371/journal.pone.0091929)
- 283 Hood GR, *et al.* 2015. Sequential divergence and the multiplicative origin of community  
284 diversity. *Proc Natl Acad Sci USA* 112:E5980-E5989. [doi.org/10.1073/pnas.1424717112](https://doi.org/10.1073/pnas.1424717112)
- 285 Kraaijeveld K, *et al.* 2016. Decay of Sexual Trait Genes in an Asexual Parasitoid Wasp. *Genome*  
286 *Biol Evol* 8:3685-3695. [doi.org/10.1093/gbe/evw273](https://doi.org/10.1093/gbe/evw273)
- 287 Laetsch DR, Blaxter ML. 2017. BlobTools: Interrogation of genome assemblies. *F1000Research*  
288 6:1287. [doi.org/10.12688/f1000research.12232.1](https://doi.org/10.12688/f1000research.12232.1)
- 289 Larter NK, Sun JS, Carlson JR. 2016. Organization and function of *Drosophila* odorant binding  
290 proteins. *Elife* 5:e20242.
- 291 LaSalle J, Gauld ID. 1993. Hymenoptera: their diversity, and their impact on the diversity of  
292 other organisms. In *Hymenoptera and Biodiversity*. eds. LaSalle J, Gauld ID. pp 1–26.  
293 CAB International, Wallingford, UK.
- 294 Luo R, *et al.* 2012. SOAPdenovo2: an empirically improved memory-efficient short-read *de*  
295 *novo* assembler. *Gigascience* 1:18. [doi.org/10.1186/2047-217X-1-18](https://doi.org/10.1186/2047-217X-1-18)
- 296 Ma WJ, Pannebakker BA, Beukeboom LW, Schwander T, Van de Zande L. 2014. Genetics of  
297 decayed sexual traits in a parasitoid wasp with endosymbiont-induced asexuality.  
298 *Heredity* 113:424-431. [doi.org/10.1038/hdy.2014.43](https://doi.org/10.1038/hdy.2014.43)

- 299 Nosil, P. 2012. *Ecological Speciation*. Oxford University Press, New York, NY, USA.
- 300 Oliveira DCSG, *et al.* 2009. Identification and characterization of the *doublesex* gene of  
301 *Nasonia*. *Insect Mol Biol* 18:315-324. [doi.org/10.1111/j.1365-2583.2009.00874.x](https://doi.org/10.1111/j.1365-2583.2009.00874.x)
- 302 Pelosi P, Iovinella I, Felicioli A, Dani FR. 2014. Soluble proteins of chemical communication:  
303 an overview across arthropods. *Front Physiol* 5:320. [doi.org/10.3389/fphys.2014.00320](https://doi.org/10.3389/fphys.2014.00320)
- 304 Peng Y, *et al.* 2017. Identification of odorant binding proteins and chemosensory proteins in  
305 *Microplitis mediator* as well as functional characterization of chemosensory protein 3.  
306 *PLOS One* 12:e0180775. [doi.org/10.1371/journal.pone.0180775](https://doi.org/10.1371/journal.pone.0180775)
- 307 Poelchau M, *et al.* 2014. The i5k Workspace@ NAL—enabling genomic data access,  
308 visualization and curation of arthropod genomes. *Nucleic Acids Res* 43:D714-D719.  
309 <https://doi.org/10.1093/nar/gku983>
- 310 Poynton HC, *et al.* 2018. The toxicogenome of *Hyaella azteca*: a model for sediment  
311 ecotoxicology and evolutionary toxicology. *Environ Sci Tech* 52:6009-6022.  
312 [doi.org/10.1021/acs.est.8b00837](https://doi.org/10.1021/acs.est.8b00837)
- 313 Robertson HM, *et al.* 2018. Genome sequence of the wheat stem sawfly, *Cephus cinctus*,  
314 representing an early-branching lineage of the Hymenoptera, illuminates evolution of  
315 hymenopteran chemoreceptors. *Genome Biol Evol* accepted.  
316 <https://doi.org/10.1093/gbe/evy232>
- 317 Robertson HM, Gadau J, Wanner KW. 2010. The insect chemoreceptor superfamily of the  
318 parasitoid jewel wasp *Nasonia vitripennis*. *Insect Mol Biol* 19:121-136.  
319 [doi.org/10.1111/j.1365-2583.2009.00979.x](https://doi.org/10.1111/j.1365-2583.2009.00979.x)

- 320 Robertson HM, Wanner KW. 2006. The chemoreceptor superfamily in the honey bee, *Apis*  
321 *mellifera*: expansion of the odorant, but not gustatory, receptor family. *Genome Res*  
322 16:1395-1403. [doi.org/10.1101/gr.5057506](https://doi.org/10.1101/gr.5057506)
- 323 Schurko AM, Logsdon JM Jr. 2008. Using a meiosis detection toolkit to investigate ancient  
324 asexual “scandals” and the evolution of sex. *Bioessays*, 6:579-589.  
325 [doi.org/10.1002/bies.20764](https://doi.org/10.1002/bies.20764)
- 326 Simão FA, Waterhouse RM, Ioannidis P, Kriventseva EV, Zdobnov EM. 2015. BUSCO:  
327 assessing genome assembly and annotation completeness with single-copy orthologs.  
328 *Bioinformatics* 31:3210-3212. [doi.org/10.1093/bioinformatics/btv351](https://doi.org/10.1093/bioinformatics/btv351)
- 329 Stireman JO, Nason JD, Heard SB, Seehawer JM. 2006. Cascading host-associated genetic  
330 differentiation in parasitoids of phytophagous insects. *P Roy Soc Lon B Bio* 273:523-  
331 530. [doi.org/10.1098/rspb.2005.3363](https://doi.org/10.1098/rspb.2005.3363)
- 332 Tvedte ES, Forbes AA, Logsdon Jr JM. 2017. Retention of core meiotic genes across diverse  
333 Hymenoptera. *J Hered* 108:791-806. [doi.org/10.1093/jhered/esx062](https://doi.org/10.1093/jhered/esx062)
- 334 van der Kooi CJ, Matthey-Doret C, Schwander T. 2017. Evolution and comparative ecology of  
335 parthenogenesis in haplodiploid arthropods. *Evolution Let* 1:304-316.  
336 [doi.org/10.1002/evl3.30](https://doi.org/10.1002/evl3.30)
- 337 van der Kooi CJ, Schwander T. 2014. On the fate of sexual traits under asexuality. *Biol Rev*  
338 89:805-819. [doi.org/10.1111/brv.12078](https://doi.org/10.1111/brv.12078)
- 339 van Wilgenburg E, Driessen G, Beukeboom LW. 2006. Single locus complementary sex  
340 determination in Hymenoptera: an "unintelligent" design? *Front Zool* 3:1.  
341 [doi.org/10.1186/1742-9994-3-1](https://doi.org/10.1186/1742-9994-3-1)



- 342 Verhulst EC, van de Zande L, Beukeboom LW. 2010. Insect sex determination: it all evolves  
343 around *transformer*. *Curr Opin Genet Dev* 20:376-383.  
344 [doi.org/10.1016/j.gde.2010.05.001](https://doi.org/10.1016/j.gde.2010.05.001)
- 345 Vieira FG, *et al.* 2012. Unique features of odorant-binding proteins of the parasitoid wasp  
346 *Nasonia vitripennis* revealed by genome annotation and comparative analyses. *PLOS*  
347 *One* 7:e43034. [doi.org/10.1371/journal.pone.0043034](https://doi.org/10.1371/journal.pone.0043034)
- 348 Vieira FG, Rozas J. 2011. Comparative genomics of the odorant-binding and chemosensory  
349 protein gene families across the Arthropoda: origin and evolutionary history of the  
350 chemosensory system. *Genome Biol Evol* 3:476-490. [doi.org/10.1093/gbe/evr033](https://doi.org/10.1093/gbe/evr033)
- 351 Walsh BD. 1867. The apple-worm and the apple-maggot. *J Hort* 2:338–343.
- 352 Wang S, *et al.* 2016. Cloning and expression profile of ionotropic receptors in the parasitoid  
353 wasp *Microplitis mediator* (Hymenoptera: Braconidae). *J Insect Physiol* 90:27-35.  
354 [doi.org/10.1016/j.jinsphys.2016.05.002](https://doi.org/10.1016/j.jinsphys.2016.05.002)
- 355 Wang Y, Coleman-Derr D, Chen G, Gu YQ. 2015. OrthoVenn: a web server for genome wide  
356 comparison and annotation of orthologous clusters across multiple species. *Nucleic Acids*  
357 *Res* 43:W78-W84. [doi.org/10.1093/nar/gkv487](https://doi.org/10.1093/nar/gkv487)
- 358 Weinstock GM, *et al.* 2006. Insights into social insects from the genome of the honeybee *Apis*  
359 *mellifera*. *Nature* 443: 931-949. [doi.org/10.1038/nature05260](https://doi.org/10.1038/nature05260)
- 360 Werren JH, *et al.* 2010. Functional and evolutionary insights from the genomes of three  
361 parasitoid *Nasonia* species. *Science* 327:343-348. [doi.org/10.1126/science.1178028](https://doi.org/10.1126/science.1178028)
- 362 Wharton RA, Marsh PM. 1978. New world Opiinae (Hymenoptera: Braconidae) parasitic on  
363 Tephritidae (Diptera). *J Wash Acad Sci*:147-167.

- 364 Wheeler D, Redding AJ, Werren JH. 2013. Characterization of an ancient lepidopteran lateral  
365 gene transfer. PLOS One 8:e59262. <https://doi.org/10.1371/journal.pone.0059262>
- 366 Whitfield JB. 2003. Phylogenetic insights into the evolution of parasitism in Hymenoptera. Adv  
367 Parasitol 54:69–100.
- 368 Zhang S, Zhang Y, Su H, Gao X, Guo Y. 2009. Identification and expression pattern of putative  
369 odorant-binding proteins and chemosensory proteins in antennae of the *Microplitis*  
370 *mediator* (Hymenoptera: Braconidae). Chem Senses 34:503-512.  
371 [doi.org/10.1093/chemse/bjp027](https://doi.org/10.1093/chemse/bjp027)
- 372 Zhou X, *et al.* 2015. Chemoreceptor evolution in hymenoptera and its implications for the  
373 evolution of eusociality. Genome Biol Evol 7:2407-2416. [doi.org/10.1093/gbe/evv149](https://doi.org/10.1093/gbe/evv149)

374 **Figure Legends**

375 **Figure 1.** Phylogenetic tree of ionotropic receptors (IRs) from sampled hymenopteran insects.

376 Dall = *Diachasma alloeum*, Mmed = *Microplitis mediator*, Nvit = *Nasonia vitripennis*, Amel =

377 *Apis mellifera*. Maximum likelihood tree generated using 656 alignment columns. Dots on nodes

378 indicate > 90% bootstrap support. The scale bar indicates the number of amino acid substitutions

379 per site.

380 **Tables**

381 **Table 1.** Summary statistics and feature counts of *D. alloeum* genome assembly.

| Assembly              | <b>Dall1.0</b> | <b>Dall2.0</b> |
|-----------------------|----------------|----------------|
| Total Sequence Length | 388,752,668    | 384,371,871    |
| Scaffold Count        | 3,968          | 3,313          |
| Scaffold N50          | 645,483        | 657,001        |
| Contig Count          | 25,534         | 24,824         |
| Contig N50            | 44,932         | 45,492         |
| GC%                   | 38.45          | 38.30          |

382

383 **Table 2.** Summary statistics and BUSCO gene content for genome assemblies in four  
384 hymenopteran insects.

| <b>Organism</b>              | <b>Assembly Accession</b>                        | <b>Assembly Size</b> | <b>Scaffold Count</b> | <b>Scaffold N50</b> | <b>Complete arthropod BUSCOs</b> |
|------------------------------|--------------------------------------------------|----------------------|-----------------------|---------------------|----------------------------------|
| <i>Diachasma alloeum</i>     | GCA_001412515.1<br>(this study)                  | 388,752,668          | 3,698                 | 645,483             | 1053 (99%)                       |
| <i>Apis mellifera</i>        | GCA_000002195.1<br>(Elsik <i>et al.</i> , 2014)  | 250,287,000          | 5,645                 | 997,192             | 1044 (98%)                       |
| <i>Nasonia vitripennis</i>   | GCA_000002325.2<br>(Werren <i>et al.</i> , 2010) | 295,780,872          | 6,169                 | 708,988             | 1038 (97%)                       |
| <i>Microplitis demolitor</i> | GCA_000572035.2<br>(Burke <i>et al.</i> , 2018)  | 241,190,213          | 1,794                 | 1,139,389           | 1057 (99%)                       |

385

386 **Table 3.** Chemosensory gene content of selected hymenopteran insects.

| Organism                         | ORs      | GRs    | IRs                 | OBPs                | CSPs               | Citations                                                                                                                      |
|----------------------------------|----------|--------|---------------------|---------------------|--------------------|--------------------------------------------------------------------------------------------------------------------------------|
| <i>D. alloeum</i>                | 187(14)  | 39(1)  | 51(5)               | 15(0)               | 9(0)               | This study                                                                                                                     |
| <i>A. mellifera</i>              | 163 (11) | 10(0)  | 10(0 <sup>a</sup> ) | 21(0 <sup>a</sup> ) | 6(0 <sup>a</sup> ) | Robertson & Wanner, 2006<br>Foret & Maleszka, 2006<br>Foret <i>et al.</i> , 2007<br>Croset <i>et al.</i> , 2010                |
| <i>N. vitripennis</i>            | 225 (76) | 47(11) | 99(54)              | 90(8)               | 9(0)               | Robertson <i>et al.</i> , 2010<br>Robertson <i>et al.</i> , 2018<br>Werren <i>et al.</i> , 2010<br>Vieira <i>et al.</i> , 2012 |
| <i>M. demolitor</i> <sup>b</sup> | 218 (4)  | 85(1)  |                     |                     |                    | Zhou <i>et al.</i> , 2015                                                                                                      |
| <i>M. mediator</i>               |          |        | 17(0 <sup>a</sup> ) | 20(0 <sup>a</sup> ) | 3(0 <sup>a</sup> ) | Zhang <i>et al.</i> , 2009<br>Wang <i>et al.</i> , 2016<br>Peng <i>et al.</i> , 2017                                           |

387 Intact gene counts are outside parentheses and pseudogene counts are inside parentheses. <sup>a</sup>pseudogene counts were not addressed  
 388 explicitly in the study. <sup>b</sup>Zhou *et al.*, 2015 provided counts of truncated models and pseudogenes for ORs and GRs, however these  
 389 sequences were not published and therefore were not used in building phylogenies.

390 **Figures**

391 **Figure 1.**

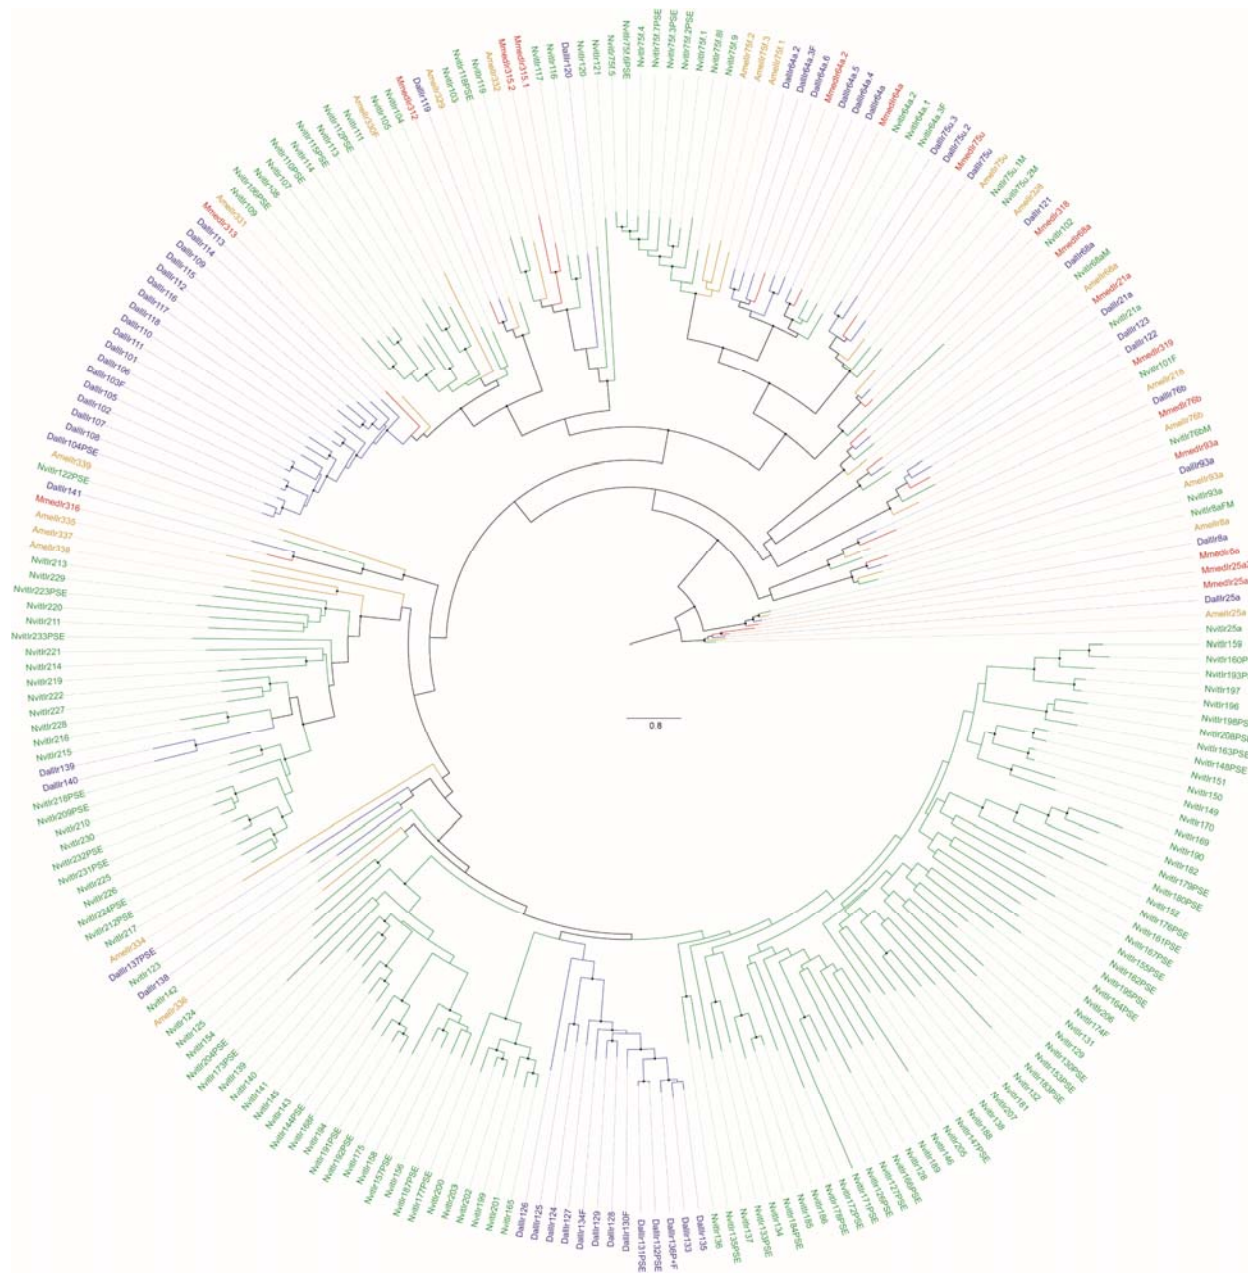

392
